# Supplementary material for: Mass cytometry-based peripheral blood analysis as a novel tool for early detection of solid tumours: a multicentre study
Source: HighWire-hosted journal article supplement (doi:10.1136/gutjnl-2022-327496), 2022-09-16

Frequency (%)

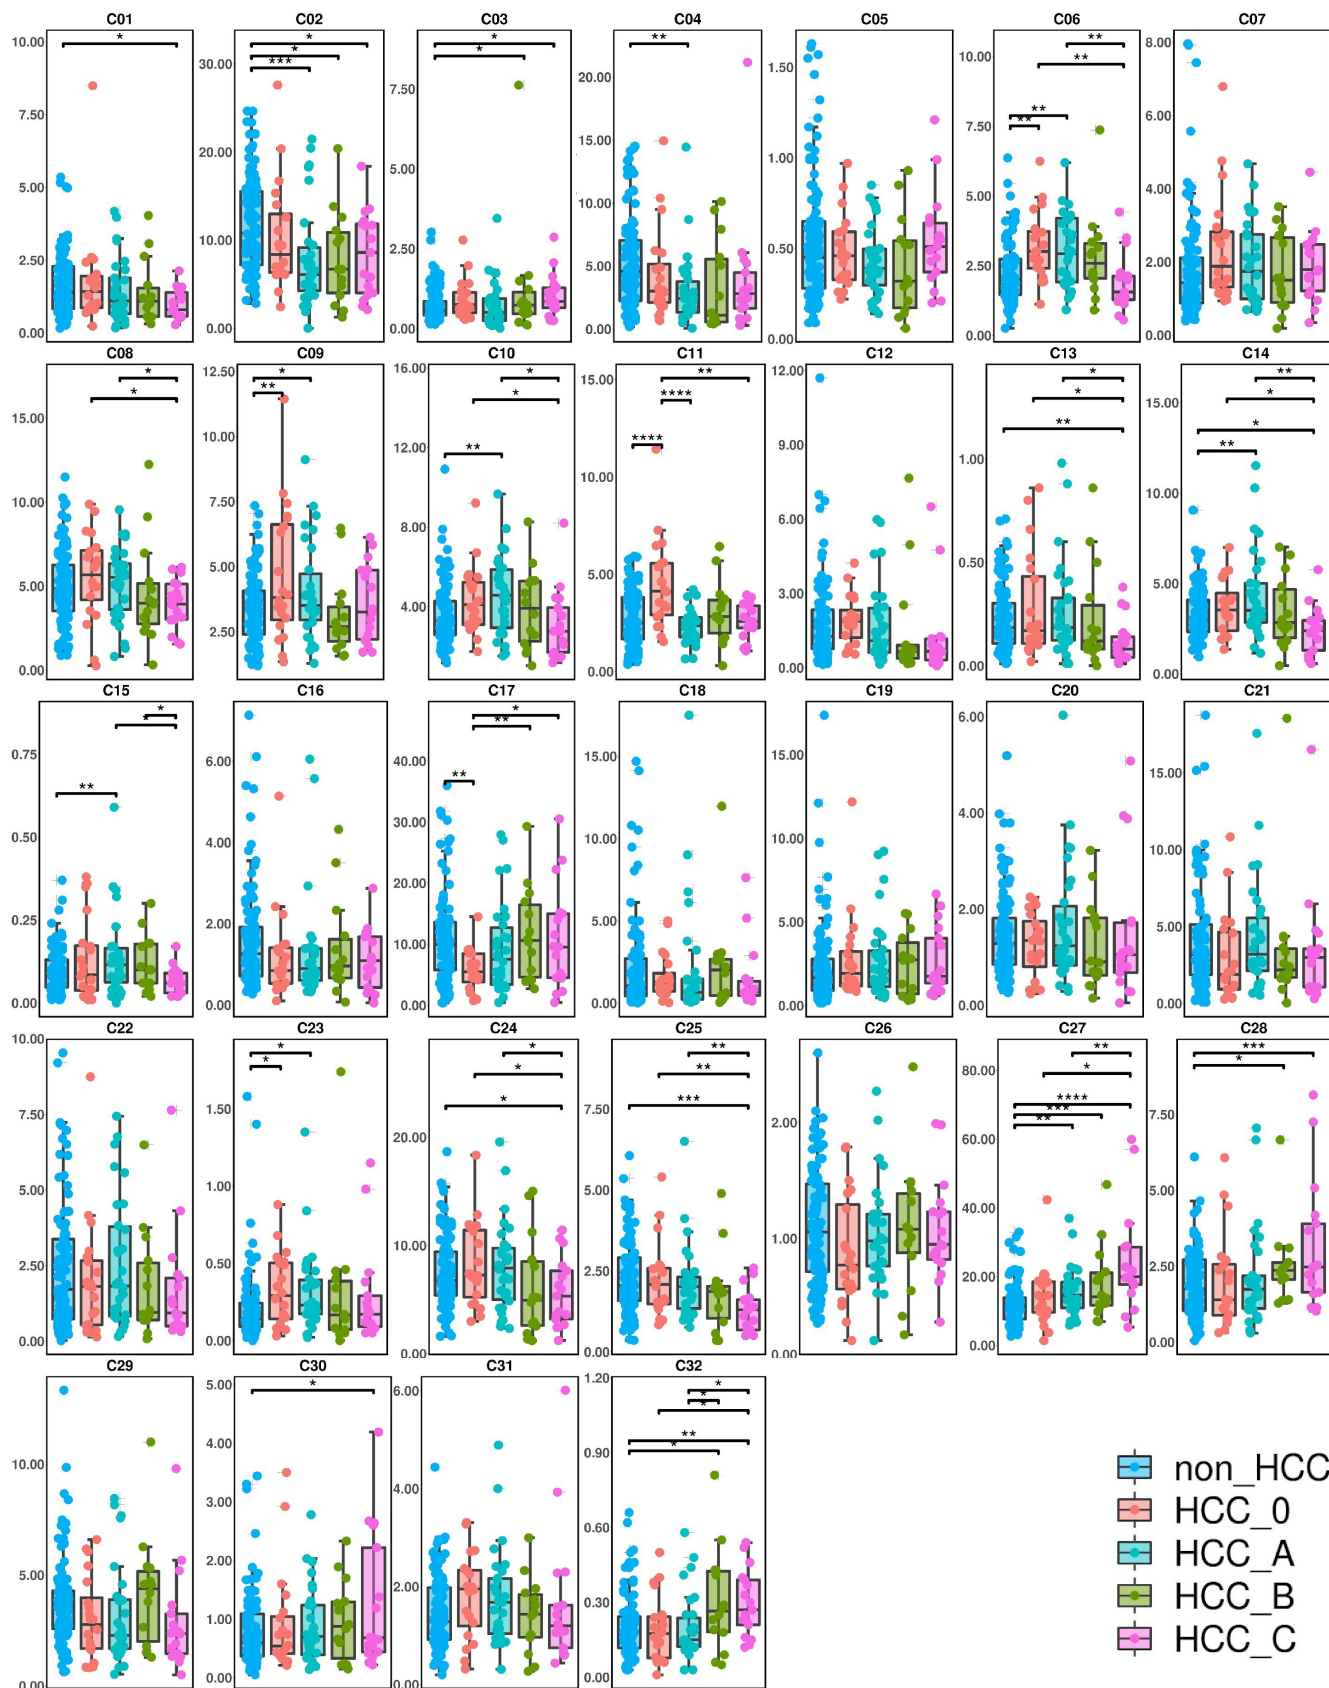

Supplement: gutjnl-2022-327496supp003_data_supplement.pdf [file gutjnl-2022-327496supp003_data_supplement.pdf]
